# Supplementary material for: Blood pressure and hypertension in athletes: a systematic review
Source: HighWire-hosted journal article supplement (doi:10.1136/bjsports-2014-093976), 2015-01-28
Supplement: bjsports-2014-093976supp.pdf [file bjsports-2014-093976supp.pdf]

## Supplemental material

Figure 1.

History

[Download history](#) [Clear history](#)

Recent queries

| Search              | Add to builder      | Query                                                                                                                                                                          | Items found              | Time     |
|---------------------|---------------------|--------------------------------------------------------------------------------------------------------------------------------------------------------------------------------|--------------------------|----------|
| <a href="#">#15</a> | <a href="#">Add</a> | Search (((((athlete) OR ((sports) AND (((professional) OR "sudden death") OR screening) OR "exercise test")))) AND (("blood pressure") OR hypertension)) AND english[Language] | <a href="#">2576</a>     | 08:47:10 |
| <a href="#">#14</a> | <a href="#">Add</a> | Search english[Language]                                                                                                                                                       | <a href="#">19275775</a> | 08:47:01 |
| <a href="#">#13</a> | <a href="#">Add</a> | Search (((athlete) OR ((sports) AND (((professional) OR "sudden death") OR screening) OR "exercise test")))) AND (("blood pressure") OR hypertension)                          | <a href="#">2945</a>     | 08:46:42 |
| <a href="#">#12</a> | <a href="#">Add</a> | Search ("blood pressure") OR hypertension                                                                                                                                      | <a href="#">614535</a>   | 08:46:31 |
| <a href="#">#11</a> | <a href="#">Add</a> | Search hypertension                                                                                                                                                            | <a href="#">378438</a>   | 08:46:26 |
| <a href="#">#10</a> | <a href="#">Add</a> | Search "blood pressure"                                                                                                                                                        | <a href="#">360002</a>   | 08:46:21 |
| <a href="#">#9</a>  | <a href="#">Add</a> | Search (athlete) OR ((sports) AND (((professional) OR "sudden death") OR screening) OR "exercise test"))                                                                       | <a href="#">69285</a>    | 08:46:08 |
| <a href="#">#8</a>  | <a href="#">Add</a> | Search (sports) AND (((professional) OR "sudden death") OR screening) OR "exercise test")                                                                                      | <a href="#">48024</a>    | 08:45:51 |
| <a href="#">#7</a>  | <a href="#">Add</a> | Search (((professional) OR "sudden death") OR screening) OR "exercise test"                                                                                                    | <a href="#">5210365</a>  | 08:45:28 |
| <a href="#">#6</a>  | <a href="#">Add</a> | Search "exercise test"                                                                                                                                                         | <a href="#">52975</a>    | 08:45:12 |
| <a href="#">#5</a>  | <a href="#">Add</a> | Search screening                                                                                                                                                               | <a href="#">4958830</a>  | 08:44:54 |
| <a href="#">#4</a>  | <a href="#">Add</a> | Search "sudden death"                                                                                                                                                          | <a href="#">31217</a>    | 08:44:48 |
| <a href="#">#3</a>  | <a href="#">Add</a> | Search professional                                                                                                                                                            | <a href="#">225442</a>   | 08:44:39 |
| <a href="#">#2</a>  | <a href="#">Add</a> | Search sports                                                                                                                                                                  | <a href="#">178760</a>   | 08:44:33 |
| <a href="#">#1</a>  | <a href="#">Add</a> | Search athlete                                                                                                                                                                 | <a href="#">30498</a>    | 08:44:17 |

**Figure 2.**

|    |                              |        |          |
|----|------------------------------|--------|----------|
| 28 | limit 27 to english language | 1857   | Advanced |
| 27 | 21 and 26                    | 2154   | Advanced |
| 26 | 22 or 23 or 24 or 25         | 893067 | Advanced |
| 25 | hypertension.tw.             | 367161 | Advanced |
| 24 | exp hypertension/            | 480099 | Advanced |
| 23 | blood pressure.tw.           | 278656 | Advanced |
| 22 | exp blood pressure/          | 389166 | Advanced |
| 21 | 5 or 8 or 12 or 16 or 20     | 51522  | Advanced |
| 20 | 3 and 19                     | 3433   | Advanced |
| 19 | 17 or 18                     | 51476  | Advanced |
| 18 | exercise test*.tw.           | 24105  | Advanced |
| 17 | exercise test/               | 40223  | Advanced |
| 16 | 3 and 15                     | 1345   | Advanced |
| 15 | 13 or 14                     | 429626 | Advanced |
| 14 | screening.tw.                | 414827 | Advanced |
| 13 | screening test/              | 47117  | Advanced |
| 12 | 3 and 11                     | 1136   | Advanced |
| 11 | 9 or 10                      | 45710  | Advanced |
| 10 | sudden death.tw.             | 22376  | Advanced |
| 9  | exp sudden death/            | 37995  | Advanced |
| 8  | 6 or 7                       | 4013   | Advanced |
| 7  | 3 and 4                      | 3871   | Advanced |
| 6  | professional sport*.tw.      | 337    | Advanced |
| 5  | 1 or 2                       | 45911  | Advanced |
| 4  | professional.tw.             | 128682 | Advanced |
| 3  | exp sport/                   | 99668  | Advanced |
| 2  | athlete*.tw.                 | 35090  | Advanced |
| 1  | athlete/                     | 29846  | Advanced |



## References

- 1 Helzberg JH, Waeckerle JF, Camilo J, et al. Comparison of cardiovascular and metabolic risk factors in professional baseball players versus professional football players. *Am J Cardiol* 2010;**106**:664-7.
- 2 van Buuren F., Mellwig KP, Butz T, et al. Left ventricular mass and oxygen uptake in top handball athletes. *Int J Sports Med* 2013;**34**:200-6.
- 3 Lively MW. Preparticipation physical examinations: a collegiate experience. *Clin J Sport Med* 1999;**9**:3-8.
- 4 Sofi F, Capalbo A, Pucci N, et al. Cardiovascular evaluation, including resting and exercise electrocardiography, before participation in competitive sports: cross sectional study. *BMJ* 2008;**337**:a346.
- 5 Pelliccia A, Kinoshita N, Pisicchio C, et al. Long-term clinical consequences of intense, uninterrupted endurance training in olympic athletes. *J Am Coll Cardiol* 2010;**55**:1619-25.
- 6 Munoz L, Norgan G, Rauschhuber M, et al. An exploratory study of cardiac health in college athletes. *Appl Nurs Res* 2009;**22**:228-35.
- 7 De Matos LD, Caldeira NA, Perlingeiro PS, et al. Cardiovascular risk and clinical factors in athletes: 10 years of evaluation. *Med Sci Sports Exerc* 2011;**43**:943-50.
- 8 Berge HM, Gjerdalen GF, Andersen TE, et al. Blood pressure in professional male football players in Norway. *J Hypertens* 2013;**31**:672-9.
- 9 Weiner RB, Wang F, Isaacs SK, et al. Blood pressure and left ventricular hypertrophy during american-style football participation. *Circulation* 2013;**128**:524-31.
- 10 Tucker AM, Vogel RA, Lincoln AE, et al. Prevalence of cardiovascular disease risk factors among National Football League players. *JAMA* 2009;**301**:2111-9.
- 11 Guo J, Zhang X, Wang L, et al. Prevalence of metabolic syndrome and its components among Chinese professional athletes of strength sports with different body weight categories. *PLoS One* 2013;**8**:e79758.
- 12 Karpinos AR, Roumie CL, Nian H, et al. High prevalence of hypertension among collegiate football athletes. *Circ Cardiovasc Qual Outcomes* 2013;**6**:716-23.
- 13 Lewis JF, Maron BJ, Diggs JA, et al. Preparticipation echocardiographic screening for cardiovascular disease in a large, predominantly black population of collegiate athletes. *Am J Cardiol* 1989;**64**:1029-33.
- 14 Corrado D, Basso C, Pavei A, et al. Trends in sudden cardiovascular death in young competitive athletes after implementation of a preparticipation screening program. *JAMA* 2006;**296**:1593-601.
- 15 Thunenkotter T, Schmied C, Dvorak J, et al. Benefits and limitations of cardiovascular pre-competition screening in international football. *Clin Res Cardiol* 2010;**99**:29-35.
- 16 Wilson MG, Chatard JC, Carre F, et al. Prevalence of electrocardiographic abnormalities in West-Asian and African male athletes. *Br J Sports Med* 2012;**46**:341-7.

- 17 Gati S, Sheikh N, Ghani S, et al. Should axis deviation or atrial enlargement be categorised as abnormal in young athletes? The athlete's electrocardiogram: time for re-appraisal of markers of pathology. *Eur Heart J* 2013.
- 18 Zaidi A, Ghani S, Sheikh N, et al. Clinical significance of electrocardiographic right ventricular hypertrophy in athletes: comparison with arrhythmogenic right ventricular cardiomyopathy and pulmonary hypertension. *Eur Heart J* 2013.
- 19 Riding NR, Salah O, Sharma S, et al. ECG and morphologic adaptations in Arabic athletes: are the European Society of Cardiology's recommendations for the interpretation of the 12-lead ECG appropriate for this ethnicity? *Br J Sports Med* 2013.
- 20 Di Luigi L, Pelliccia A, Bonetti A, et al. Clinical efficacy and preventive role of the pre-participation physical examination in Italy. *Med Sport* 2004;**57**:243-70.
- 21 Magalski A, McCoy M, Zabel M, et al. Cardiovascular screening with electrocardiography and echocardiography in collegiate athletes. *Am J Med* 2011;**124**:511-8.
- 22 Papadakis M, Carre F, Kervio G, et al. The prevalence, distribution, and clinical outcomes of electrocardiographic repolarization patterns in male athletes of African/Afro-Caribbean origin. *Eur Heart J* 2011;**32**:2304-13.
- 23 Schmied C, Di Paolo FM, Zerguini AY, et al. Screening athletes for cardiovascular disease in Africa: a challenging experience. *Br J Sports Med* 2013;**47**:579-84.
- 24 Maron BJ, Bodison SA, Wesley YE, et al. Results of screening a large group of intercollegiate competitive athletes for cardiovascular disease. *J Am Coll Cardiol* 1987;**10**:1214-21.
- 25 Rontoyannis GP, Stalikas A, Sarros G, et al. Medical, morphological and functional aspects of Greek football referees. *J Sports Med Phys Fitness* 1998;**38**:208-14.
- 26 Urhausen A, Monz T, Kindermann W. Sports-specific adaptation of left ventricular muscle mass in athlete's heart. I. An echocardiographic study with combined isometric and dynamic exercise trained athletes (male and female rowers). *Int J Sports Med* 1996;**17 Suppl 3**:S145-S151.
- 27 Pelliccia A, Maron BJ, Culasso F, et al. Clinical significance of abnormal electrocardiographic patterns in trained athletes. *Circulation* 2000;**102**:278-84.
- 28 Maskhulia L, Chabashvili N, Kakhabrishvili Z, et al. Electrocardiographic patterns and systolic and diastolic functions of the heart in the highly trained football players with increased left ventricular mass. *Georgian Med News* 2006;76-80.
- 29 Caselli S, Di PR, Di Paolo FM, et al. Left ventricular systolic performance is improved in elite athletes. *Eur J Echocardiogr* 2011;**12**:514-9.
- 30 Noseworthy PA, Weiner R, Kim J, et al. Early repolarization pattern in competitive athletes: clinical correlates and the effects of exercise training. *Circ Arrhythm Electrophysiol* 2011;**4**:432-40.
- 31 Varga-Pinter B, Horvath P, Kneffel Z, et al. Resting blood pressure values of adult athletes. *Kidney Blood Press Res* 2011;**34**:387-95.
- 32 Pougnet R, Costanzo LD, Lodde B, et al. Cardiovascular risk factors and cardiovascular risk assessment in professional divers. *Int Marit Health* 2012;**63**:164-9.

- 33 Schmied C, Notz S, Cribari M, et al. Cardiac pre-competition screening in Swiss athletes. Current situation in competitive athletes and short-time assessment of an exemplary local screening program. *Swiss Med Wkly* 2012;**142**:w13575.
- 34 Zaidi A, Ghani S, Sharma R, et al. Physiologic Right Ventricular Adaptation in Elite Athletes of African and Afro-Caribbean Origin. *Circulation* 2013.
- 35 BERRY WT, BEVERIDGE JB, . The diet, haemoglobin values, and blood pressure of Olympic athletes. *Br Med J* 1949;**1**:300-4.
- 36 Andersen KL, Elvik A. The resting arterial blood pressure in athletes. *Acta Med Scand* 1956;**153**:367-71.
- 37 Siegel D, Benowitz N, Ernster VL, et al. Smokeless tobacco, cardiovascular risk factors, and nicotine and cotinine levels in professional baseball players. *Am J Public Health* 1992;**82**:417-21.
- 38 Douglas PS, O'Toole ML, Katz SE, et al. Left ventricular hypertrophy in athletes. *Am J Cardiol* 1997;**80**:1384-8.
- 39 D'Andrea A, Limongelli G, Caso P, et al. Association between left ventricular structure and cardiac performance during effort in two morphological forms of athlete's heart. *Int J Cardiol* 2002;**86**:177-84.
- 40 Abergel E, Chatellier G, Hagege AA, et al. Serial left ventricular adaptations in world-class professional cyclists: implications for disease screening and follow-up. *J Am Coll Cardiol* 2004;**44**:144-9.
- 41 Sharwood KA, Collins M, Goedecke JH, et al. Weight changes, medical complications, and performance during an Ironman triathlon. *Br J Sports Med* 2004;**38**:718-24.
- 42 Maldonado J, Pereira T, Polonia J, et al. Modulation of arterial stiffness with intensive competitive training. *Rev Port Cardiol* 2006;**25**:709-14.
- 43 Babaei Bigi MA, Aslani A. Aortic root size and prevalence of aortic regurgitation in elite strength trained athletes. *Am J Cardiol* 2007;**100**:528-30.
- 44 Basavarajaiah S, Boraita A, Whyte G, et al. Ethnic differences in left ventricular remodeling in highly-trained athletes relevance to differentiating physiologic left ventricular hypertrophy from hypertrophic cardiomyopathy. *J Am Coll Cardiol* 2008;**51**:2256-62.
- 45 Molina L, Mont L, Marrugat J, et al. Long-term endurance sport practice increases the incidence of lone atrial fibrillation in men: a follow-up study. *Europace* 2008;**10**:618-23.
- 46 Miranda-Vilela AL, Pereira LC, Goncalves CA, et al. Pequi fruit (*Caryocar brasiliense* Camb.) pulp oil reduces exercise-induced inflammatory markers and blood pressure of male and female runners. *Nutr Res* 2009;**29**:850-8.
- 47 D'Andrea A, Cocchia R, Riegler L, et al. Aortic stiffness and distensibility in top-level athletes. *J Am Soc Echocardiogr* 2012;**25**:561-7.
- 48 Pagourelas ED, Kouidi E, Efthimiadis GK, et al. Right atrial and ventricular adaptations to training in male Caucasian athletes: an echocardiographic study. *J Am Soc Echocardiogr* 2013;**26**:1344-52.

49 Vitarelli A, Capotosto L, Placanica G, et al. Comprehensive assessment of biventricular function and aortic stiffness in athletes with different forms of training by three-dimensional echocardiography and strain imaging. *Eur Heart J Cardiovasc Imaging* 2013;**14**:1010-20.

50 Malhotra R, West JJ, Dent J, et al. Cost and yield of adding electrocardiography to history and physical in screening Division I intercollegiate athletes: A 5-year experience. *Heart Rhythm* 2011;**8**:721-7.

51 Chandra N, Bastiaenen R, Papadakis M, et al. The prevalence of ECG anomalies in young individuals; Relevance to a nationwide cardiac screening program. *J Am Coll Cardiol* 2014.



## **Figure legends for supplemental materials**

### **Figure 1.**

Search strategy PubMed, updated 6th of April 2014.

### **Figure 2.**

Search strategy EMBASE, updated 6<sup>th</sup> of April 2014.

### **Figure 3.**

Methodological elements of blood pressure measurements described in the different studies
